# Supplementary material for: Glucocorticoid receptor alters isovolumetric contraction and restrains cardiac fibrosis
Source: PubMed Central journal article supplement (PMC5292999; doi:10.1530/joe-16-0458), 2017-01-05

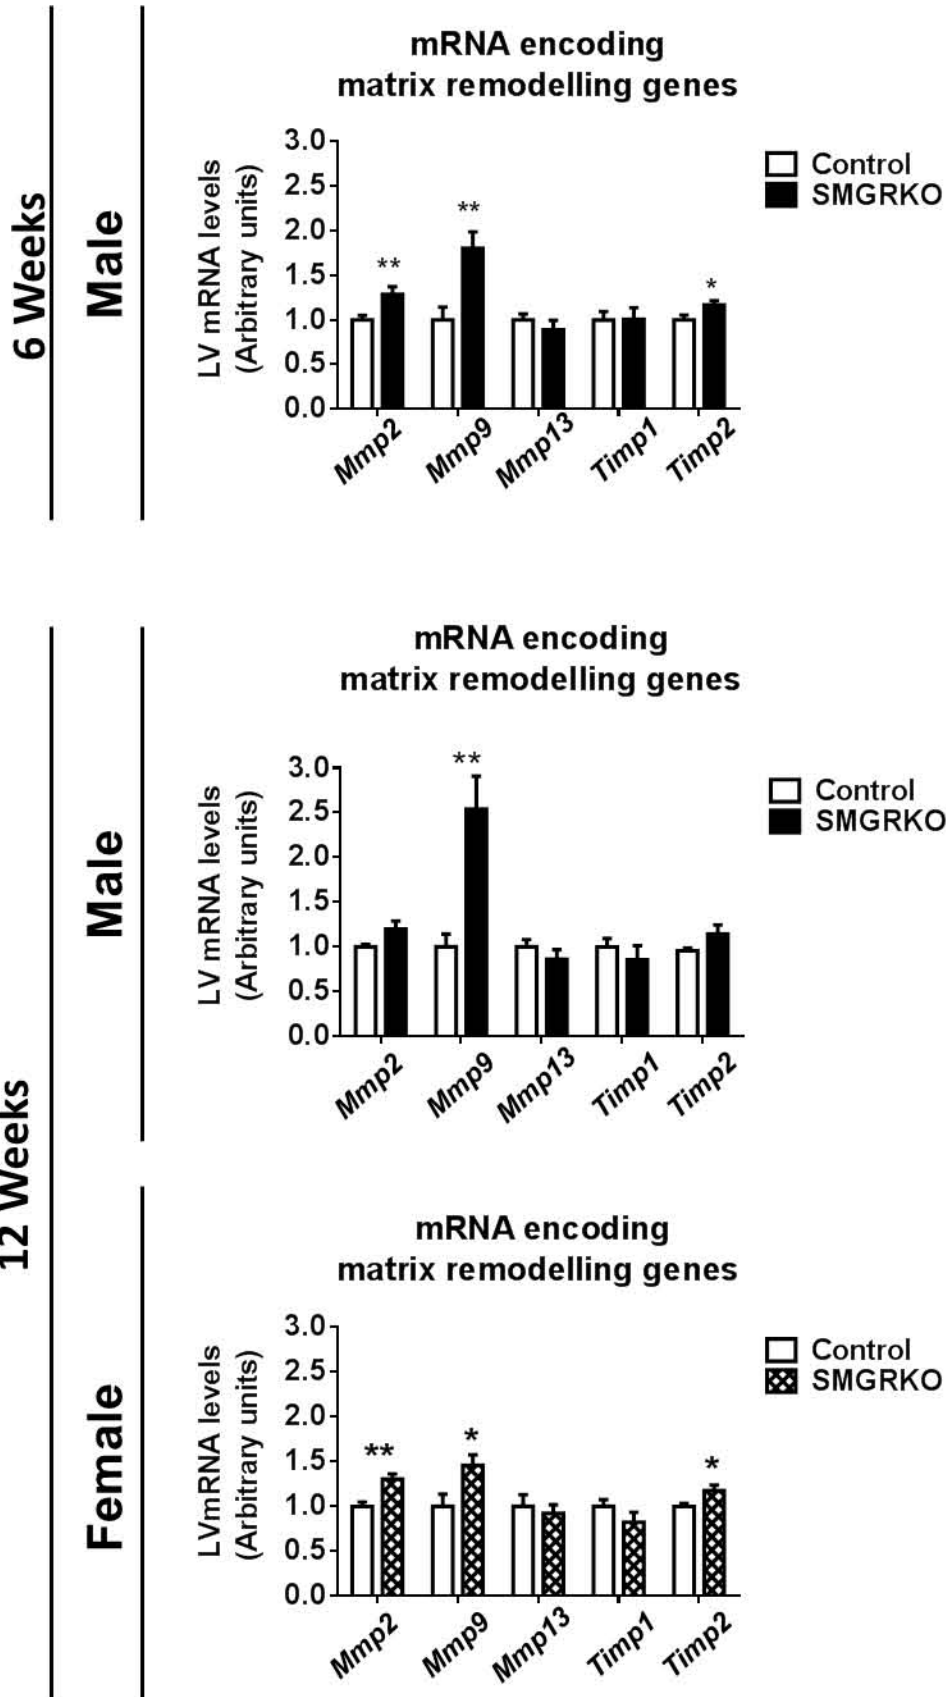

Supplement: joe-232-351-s002.pdf [file joe-232-351-s002.pdf]
