# Supplementary material for: Glucocorticoid receptor alters isovolumetric contraction and restrains cardiac fibrosis
Source: PubMed Central journal article supplement (PMC5292999; doi:10.1530/joe-16-0458), 2017-01-05
Supplement: joe-232-351-t001.pdf [file joe-232-351-t001.pdf]

**Supplementary Table 1. Primer sequences and probes used for RT-PCR.**

Primers were designed using the Roche Applied Science Universal Probe Library Assay Design Centre and tested for specificity.

| Primer Name   | Sequence 5'-3'           |                         | Probe # |
|---------------|--------------------------|-------------------------|---------|
|               | Forward                  | Reverse                 |         |
| <i>Actb</i>   | ctaaggccaaccgtgaaaag     | accagaggcatacagggaca    | 64      |
| <i>Nppa</i>   | cacagatctgatggattcaaga   | cctcatcttctaccggcatc    | 25      |
| <i>Ctgf</i>   | tgacctggaggaaaacattaaga  | agccctgtatgtctcacactg   | 71      |
| <i>Col1a2</i> | gcaggttcacctactctgtctct  | cttgccccattcatttgtct    | 46      |
| <i>Col3a1</i> | tcccctggaatctgtgaatc     | tgagtcgaattggggagaat    | 49      |
| <i>Fkbp5</i>  | aaacgaaggagcaacggtaa     | tcaaatgtcctccaccaca     | 97      |
| <i>Gapdh</i>  | gggttcctataataacgcactgc  | ccattttgtctacgggacga    | 52      |
| <i>Nr3c1</i>  | caaagattgcaggtatcctatgaa | ctggctcttcagaccttc      | 91      |
| <i>Nr3c2</i>  | ccctaccatgtcctagaaaagc   | agaacgctccaaggctgag     | 109     |
| <i>Myh6</i>   | cgcatcaaggagctcacc       | cctgcagccgcattaagt      | 6       |
| <i>Myh7</i>   | gcatctggaaattccgttagg    | ggctcgtcatccttattagacc  | 16      |
| <i>Mmp2</i>   | taacctggatgccgtcgt       | tcaggtaataagcacccttgaa  | 77      |
| <i>Mmp9</i>   | acgacatagacggcatcca      | gctgtgggtcagttgtgggtg   | 19      |
| <i>Mmp13</i>  | gccagaacttccaacat        | tcagagcccagaattttctcc   | 89      |
| <i>Sgk1</i>   | gattgccagcaacacctatg     | ttgattgtgagagggacttg    | 91      |
| <i>Tgfb1</i>  | tgagcaacatgtggaactc      | cagcagccggttaccaag      | 72      |
| <i>Timp1</i>  | tcagagcccagaattttctcc    | agggatagataaacagggaaact | 76      |
| <i>Timp2</i>  | cgttttgcaatgcagacgta     | ggaatccacctccttctcg     | 21      |

#
