# Supplementary material for: Glucocorticoid receptor alters isovolumetric contraction and restrains cardiac fibrosis
Source: PubMed Central journal article supplement (PMC5292999; doi:10.1530/joe-16-0458), 2017-01-05
Supplement: joe-232-351-t002.pdf [file joe-232-351-t002.pdf]

**Supplementary Table 2. Echocardiographic Doppler measurements of blood flow across the mitral valve of 10 week old male SMGRKO mice and littermate controls.** Values are means  $\pm$  SEM with number indicated in brackets. \* $p$ <0.05, \*\* $p$ <0.01 (Unpaired t-test).

| Doppler measurement (Unit)                                                        | Sex    | Control                | SMGRKO                 |
|-----------------------------------------------------------------------------------|--------|------------------------|------------------------|
| Peak E Wave Velocity (mm/s)                                                       | Male   | 860 $\pm$ 37 (11)      | 918 $\pm$ 32 (16)      |
|                                                                                   | Female | 955 $\pm$ 23 (11)      | 891 $\pm$ 38 (11)      |
| Peak A Wave Velocity(mm/s)                                                        | Male   | 580 $\pm$ 24 (11)      | 638 $\pm$ 24 (15)      |
|                                                                                   | Female | 485 $\pm$ 27 (12)      | 416 $\pm$ 28 (11)      |
| E/A Wave Ratio                                                                    | Male   | 1.50 $\pm$ 0.07 (11)   | 1.42 $\pm$ 0.06 (14)   |
|                                                                                   | Female | 1.92 $\pm$ 0.09 (11)   | 2.10 $\pm$ 0.11 (10)   |
| E wave Deceleration (mm/s <sup>2</sup> )                                          | Male   | 32567 $\pm$ 1925 (10)  | 36654 $\pm$ 1618 (16)  |
|                                                                                   | Female | 39712 $\pm$ 1749 (12)  | 44320 $\pm$ 3865 (11)  |
| MDI = $\frac{\text{E wave Decel. Time}}{\text{Peak E wave velocity}}$ (ms/[mm/s]) | Male   | 0.031 $\pm$ 0.002 (10) | 0.029 $\pm$ 0.001 (15) |
|                                                                                   | Female | 0.025 $\pm$ 0.001 (12) | 0.022 $\pm$ 0.002 (10) |
| Pressure Half Time                                                                | Male   | 7.08 $\pm$ 0.34 (10)   | 6.48 $\pm$ 0.22 (14)   |
|                                                                                   | Female | 6.26 $\pm$ 0.27 (11)   | 5.56 $\pm$ 0.33 (11)   |
| Myocardial Performance Index (Arbitrary units)                                    | Male   | 0.64 $\pm$ 0.03 (11)   | 0.73 $\pm$ 0.02 (16) * |
|                                                                                   | Female | 0.56 $\pm$ 0.03 (12)   | 0.65 $\pm$ 0.03 (11)   |
| Isovolumetric Contraction Time (ms)                                               | Male   | 12.9 $\pm$ 0.8 (11)    | 15.5 $\pm$ 0.6 (15) *  |
|                                                                                   | Female | 11.8 $\pm$ 0.5 (11)    | 14.8 $\pm$ 0.8 (11) ** |
| Ejection Time (ms)                                                                | Male   | 42.7 $\pm$ 1.1 (11)    | 40.44 $\pm$ 0.82 (15)  |
|                                                                                   | Female | 45.5 $\pm$ 0.8 (11)    | 47.0 $\pm$ 0.90 (10)   |
| Isovolumetric Relaxation Time (ms)                                                | Male   | 14.4 $\pm$ 1.1 (11)    | 13.7 $\pm$ 0.4 (16)    |
|                                                                                   | Female | 13.5 $\pm$ 0.5 (12)    | 15.2 $\pm$ 0.7 (10)    |
| Heart Rate (BPM)                                                                  | Male   | 482 $\pm$ 17 (11)      | 464 $\pm$ 14 (15)      |
|                                                                                   | Female | 454 $\pm$ 9 (12)       | 420 $\pm$ 8 (10) *     |

#
