# Supplementary material for: Glucocorticoid receptor alters isovolumetric contraction and restrains cardiac fibrosis
Source: PubMed Central journal article supplement (PMC5292999; doi:10.1530/joe-16-0458), 2017-01-05
Supplement: joe-232-351-t003.pdf [file joe-232-351-t003.pdf]

**Supplementary Table 3. Echocardiography measurements obtained from the parasternal long axis in SMGRKO mice and control littermates aged 10 weeks.** Echocardiography parameters were obtained from measurements made from the parasternal long-axis view in B-Mode and M-Mode. Data are means  $\pm$  SEM and were analysed using an unpaired t-test, n=10-17 (indicated in brackets), \*p<0.05.

| <b>Echocardiography Parameter<br/>(Units; Acquisition Mode)</b> | <b>Sex</b> | <b>Control</b>        | <b>SMGRKO</b>          |
|-----------------------------------------------------------------|------------|-----------------------|------------------------|
| LV End-Systolic Area (mm <sup>2</sup> ;B)                       | Male       | 15.8 $\pm$ 1.2 (12)   | 15.3 $\pm$ 0.7 (17)    |
|                                                                 | Female     | 11.3 $\pm$ 0.8 (12)   | 10.1 $\pm$ 0.7 (10)    |
| LV End-Diastolic Area (mm <sup>2</sup> ;B)                      | Male       | 24.0 $\pm$ 1.0 (12)   | 24.9 $\pm$ 0.7 (17)    |
|                                                                 | Female     | 20.4 $\pm$ 0.8 (12)   | 19.3 $\pm$ 10.5 (10)   |
| Endocardial Area Change (mm <sup>2</sup> ;B)                    | Male       | 8.38 $\pm$ 0.41 (12)  | 9.63 $\pm$ 0.39 (17) * |
|                                                                 | Female     | 8.76 $\pm$ 0.56 (12)  | 8.95 $\pm$ 0.42 (10)   |
| Endocardial %Fractional Area Change (%;B)                       | Male       | 35.5 $\pm$ 2.3 (12)   | 37.7 $\pm$ .1.3 (16)   |
|                                                                 | Female     | 43.7 $\pm$ 2.5 (12)   | 46.6 $\pm$ 2.3 (10)    |
| Ejection Fraction (%;B)                                         | Male       | 57.2 $\pm$ 2.9 (11)   | 57.4 $\pm$ 1.7 (16)    |
|                                                                 | Female     | 64.8 $\pm$ 2.8 (12)   | 68.4 $\pm$ 2.9 (10)    |
| Stroke Volume ( $\mu$ l;B)                                      | Male       | 32.3 $\pm$ 1.7 (12)   | 38.2 $\pm$ 1.8 (16) *  |
|                                                                 | Female     | 30.5 $\pm$ 1.8 (12)   | 29.0 $\pm$ 1.3 (10)    |
| Cardiac Output (ml/min;B)                                       | Male       | 15.5 $\pm$ 0.7 (11)   | 18.7 $\pm$ 0.9 (17) *  |
|                                                                 | Female     | 13.7 $\pm$ 0.9 (12)   | 12.8 $\pm$ 0.6 (9)     |
| LV Wall Thickness (mm;B)                                        | Male       | 0.95 $\pm$ 0.04 (12)  | 0.86 $\pm$ 0.02 (17) * |
|                                                                 | Female     | 0.80 $\pm$ 0.02 (12)  | 0.83 $\pm$ 0.02 (10)   |
| Left Ventricle Anterior Wall; systole (mm;M)                    | Male       | 1.24 $\pm$ 0.11 (11)  | 1.15 $\pm$ 0.05 (16)   |
|                                                                 | Female     | 1.51 $\pm$ 0.07 (12)  | 1.72 $\pm$ 0.07 (10)   |
| Left Ventricle Anterior Wall; diastole (mm;M)                   | Male       | 0.82 $\pm$ 0.06 (11)  | 0.79 $\pm$ 0.03 (16)   |
|                                                                 | Female     | 0.96 $\pm$ 0.02 (12)  | 1.03 $\pm$ 0.05 (10)   |
| Left Ventricle Internal Diameter; systole (mm;M)                | Male       | 2.23 $\pm$ 0.13 (11)  | 2.45 $\pm$ 0.11 (16)   |
|                                                                 | Female     | 1.95 $\pm$ 0.11 (12)  | 1.67 $\pm$ 0.11(10)    |
| Left Ventricle Internal Diameter; diastole (mm;M)               | Male       | 3.70 $\pm$ 0.08 (11)  | 3.91 $\pm$ 0.05 (15) * |
|                                                                 | Female     | 3.41 $\pm$ 0.08 (12)  | 3.27 $\pm$ 0.07(10)    |
| Left Ventricle Paraventricular Wall; systole (mm;M)             | Male       | 1.43 $\pm$ 0.05 (10)  | 1.44 $\pm$ 0.07 (16)   |
|                                                                 | Female     | 1.21 $\pm$ 0.12 (12)  | 1.45 $\pm$ 0.06 (10)   |
| Left Ventricle Paraventricular Wall ; diastole (mm;M)           | Male       | 0.90 $\pm$ 0.06 (10)  | 0.90 $\pm$ 0.05 (15)   |
|                                                                 | Female     | 0.83 $\pm$ 0.08 (12)  | 1.03 $\pm$ 0.07 (10)   |
| Fractional Shortening (%;M)                                     | Male       | 40.0 $\pm$ 2.9 (12)   | 37.5 $\pm$ 2.0 (16)    |
|                                                                 | Female     | 43.2 $\pm$ 2.2 (12)   | 49.3 $\pm$ 2.7 (10)    |
| Left Ventricle Mass (mg;M)                                      | Male       | 100.4 $\pm$ 10.9 (11) | 96.0 $\pm$ 4.2 (15)    |
|                                                                 | Female     | 86.5 $\pm$ 6.9 (12)   | 98.5 $\pm$ 6.0 (10)    |

#
