# Supplementary material for: Glucocorticoid receptor alters isovolumetric contraction and restrains cardiac fibrosis
Source: PubMed Central journal article supplement (PMC5292999; doi:10.1530/joe-16-0458), 2017-01-05
Supplement: joe-232-351-t005.pdf [file joe-232-351-t005.pdf]

**Supplementary Table 5. Physiological parameters for female SMGRKO mice and littermate controls at 12 weeks of age.** Values are means  $\pm$  SEM with number indicated in brackets. \*\*\*\*p<0.0001. Data were analysed by unpaired t-test.

| Parameter                                         | Female Control           | Female SMGRKO                |
|---------------------------------------------------|--------------------------|------------------------------|
| Mean systolic blood pressure (mmHg)               | 115 $\pm$ 2 (7)          | 119 $\pm$ 2 (9)              |
| Body weight (g)                                   | 21.8 $\pm$ 0.6 (10)      | 23.1 $\pm$ 0.3 (11)          |
| Kidney weight (% body weight)                     | 0.49 $\pm$ 0.03 (10)     | 0.53 $\pm$ 0.02 (11)         |
| Adrenal gland weight (% body weight)              | 0.0103 $\pm$ 0.0003 (10) | 0.0112 $\pm$ 0.0003 (10)     |
| Heart weight (normalised for tibia length; mg/mm) | 5.73 $\pm$ 0.14 (10)     | 6.56 $\pm$ 0.08 (10)<br>**** |

#
