# Supplementary material for: Glucocorticoid receptor alters isovolumetric contraction and restrains cardiac fibrosis
Source: PubMed Central journal article supplement (PMC5292999; doi:10.1530/joe-16-0458), 2017-01-05
Supplement: joe-232-351-t006.pdf [file joe-232-351-t006.pdf]

**Supplementary Table 6. Mouse Fibrosis PCR Array data.** Mean values are  $2^{-\Delta C_t}$  where  $\Delta C_t = C_t$  gene of interest -  $C_t$  house-keeper gene. The average house-keeper  $C_t$  was taken from a panel of genes (*Gusb*, *Actb*, *Gapdh*, *Hprt* and *Hsp90ab1*). N=8 per group. Data were analysed by two-way ANOVA, \* $p < 0.05$ , \*\* $p < 0.01$ , \*\*\* $p < 0.001$ , \*\*\*\* $p < 0.0001$ .

|                                                                 |         |        | Control   |           |   | SMGRKO    |           |   | 2-way ANOVA |      |          |
|-----------------------------------------------------------------|---------|--------|-----------|-----------|---|-----------|-----------|---|-------------|------|----------|
|                                                                 |         |        | MEAN      | SEM       | N | MEAN      | SEM       | N | Interaction | Sex  | Genotype |
| Actin, alpha 2, smooth muscle, aorta                            | Acta2   | Male   | 0.322     | 0.04      | 8 | 0.528     | 0.034     | 8 |             |      |          |
|                                                                 |         | Female | 0.596     | 0.08      | 7 | 0.772     | 0.13      | 7 |             | **   | *        |
| Angiotensinogen (serpin peptidase inhibitor, clade A, member 8) | Agt     | Male   | 0.00321   | 0.00022   | 8 | 0.00131   | 0.00016   | 8 |             |      |          |
|                                                                 |         | Female | 0.00417   | 0.0004    | 7 | 0.00137   | 0.000065  | 7 | ns          | *    | ****     |
| Thymoma viral proto-oncogene 1                                  | Akt1    | Male   | 0.214     | 0.0065    | 8 | 0.218     | 0.017     | 8 |             |      |          |
|                                                                 |         | Female | 0.22      | 0.017     | 7 | 0.231     | 0.015     | 8 | ns          | ns   | ns       |
| B-cell leukemia/lymphoma 2                                      | Bcl2    | Male   | 0.0164    | 0.00086   | 8 | 0.0257    | 0.0014    | 8 |             |      |          |
|                                                                 |         | Female | 0.0197    | 0.0012    | 8 | 0.0245    | 0.0012    | 7 | ns          | ns   | ****     |
| Bone morphogenetic protein 7                                    | Bmp7    | Male   | 0.00278   | 0.0003    | 8 | 0.00198   | 0.00025   | 8 |             |      |          |
|                                                                 |         | Female | 0.00262   | 0.00026   | 8 | 0.00194   | 0.00023   | 8 | ns          | ns   | **       |
| Caveolin 1, caveolae protein                                    | Cav1    | Male   | 0.38      | 0.025     | 8 | 0.383     | 0.033     | 8 |             |      |          |
|                                                                 |         | Female | 0.451     | 0.038     | 8 | 0.343     | 0.03      | 7 | ns          | ns   | ns       |
| Chemokine (C-C motif) ligand 11                                 | Ccl11   | Male   | 0.00498   | 0.00057   | 7 | 0.00323   | 0.00038   | 8 |             |      |          |
|                                                                 |         | Female | 0.00174   | 0.00033   | 8 | 0.00101   | 0.00021   | 8 | ns          | **** | **       |
| Chemokine (C-C motif) ligand 12                                 | Ccl12   | Male   | 0.00605   | 0.00054   | 7 | 0.0097    | 0.002     | 7 |             |      |          |
|                                                                 |         | Female | 0.0134    | 0.0025    | 8 | 0.00886   | 0.0015    | 7 | *           | ns   | ns       |
| Chemokine (C-C motif) ligand 3                                  | Ccl3    | Male   | 0.000524  | 0.000085  | 8 | 0.000589  | 0.0001    | 8 |             |      |          |
|                                                                 |         | Female | 0.000588  | 0.0001    | 7 | 0.000389  | 0.000079  | 7 | ns          | ns   | ns       |
| Chemokine (C-C motif) receptor 2                                | Ccr2    | Male   | 0.00467   | 0.00048   | 8 | 0.00573   | 0.00081   | 8 |             |      |          |
|                                                                 |         | Female | 0.00396   | 0.00064   | 8 | 0.00296   | 0.00028   | 7 | ns          | **   | ns       |
| CCAA1/enhancer binding protein (C/EBP), beta                    | Cebpb   | Male   | 0.06      | 0.0077    | 6 | 0.0463    | 0.0029    | 6 |             |      |          |
|                                                                 |         | Female | 0.0449    | 0.01      | 5 | 0.0488    | 0.0065    | 5 | ns          | ns   | ns       |
| Collagen, type I, alpha 2                                       | Col1    | Male   | 0.216     | 0.0079    | 7 | 0.244     | 0.015     | 7 |             |      |          |
|                                                                 |         | Female | 0.235     | 0.016     | 7 | 0.285     | 0.025     | 7 | ns          | ns   | *        |
| Collagen, type III, alpha 1                                     | col3a1  | Male   | 0.58      | 0.046     | 8 | 0.689     | 0.048     | 8 |             |      |          |
|                                                                 |         | Female | 0.706     | 0.049     | 7 | 0.891     | 0.064     | 7 | ns          | **   | **       |
| Connective tissue growth factor                                 | CTGF    | Male   | 0.183     | 0.011     | 7 | 0.223     | 0.044     | 8 |             |      |          |
|                                                                 |         | Female | 0.168     | 0.015     | 8 | 0.17      | 0.01      | 7 | ns          | ns   | ns       |
| Chemokine (C-X-C motif) receptor 4                              | Cxcr4   | Male   | 0.0262    | 0.00076   | 7 | 0.0304    | 0.0036    | 8 |             |      |          |
|                                                                 |         | Female | 0.0301    | 0.0029    | 8 | 0.0274    | 0.0021    | 7 | ns          | ns   | ns       |
| Decorin                                                         | Dcn     | Male   | 1.76      | 0.14      | 8 | 1.74      | 0.12      | 8 |             |      |          |
|                                                                 |         | Female | 1.56      | 0.064     | 7 | 1.53      | 0.057     | 7 | ns          | ns   | ns       |
| Endothelin1                                                     | Edn1    | Male   | 0.0068    | 0.0003    | 7 | 0.00716   | 0.00056   | 8 |             |      |          |
|                                                                 |         | Female | 0.0066    | 0.00037   | 7 | 0.00708   | 0.00028   | 7 | ns          | ns   | ns       |
| Epidermal growth factor                                         | Egf     | Male   | 0.0132    | 0.0012    | 8 | 0.0134    | 0.002     | 8 |             |      |          |
|                                                                 |         | Female | 0.00875   | 0.0015    | 8 | 0.014     | 0.0013    | 8 | ns          | ns   | ns       |
| Endoglin                                                        | Eng     | Male   | 0.159     | 0.0034    | 8 | 0.175     | 0.0094    | 8 |             |      |          |
|                                                                 |         | Female | 0.157     | 0.0085    | 7 | 0.158     | 0.005     | 7 | ns          | ns   | ns       |
| Fas ligand (TNF superfamily, member 6)                          | Fasl    | Male   | 0.0000747 | 0.000014  | 7 | 0.00009   | 0.000021  | 7 |             |      |          |
|                                                                 |         | Female | 0.000116  | 0.000032  | 7 | 0.0000643 | 0.000017  | 7 | ns          | ns   | ns       |
| Gremlin 1                                                       | Grem1   | Male   | 0.0000251 | 0.0000045 | 7 | 0.0000182 | 0.0000029 | 7 |             |      |          |
|                                                                 |         | Female | 0.0000185 | 0.0000025 | 7 | 0.0000185 | 0.000003  | 7 | ns          | ns   | ns       |
| Hepatocyte growth factor                                        | Hgf     | Male   | 0.00137   | 0.000081  | 8 | 0.00133   | 0.00011   | 8 |             |      |          |
|                                                                 |         | Female | 0.00142   | 0.00013   | 7 | 0.00135   | 0.0001    | 7 | ns          | ns   | ns       |
| Interferon gamma                                                | ifng    | Male   | 0.000123  | 0.000045  | 8 | 0.00011   | 0.000026  | 8 |             |      |          |
|                                                                 |         | Female | 0.00014   | 0.000054  | 8 | 0.000161  | 0.000036  | 7 | ns          | ns   | ns       |
| Interleukin 10                                                  | il10    | Male   | 0.000174  | 0.000048  | 8 | 0.000236  | 0.000056  | 8 |             |      |          |
|                                                                 |         | Female | 0.000171  | 0.00004   | 7 | 0.000205  | 0.000045  | 8 | ns          | ns   | ns       |
| Interleukin 13                                                  | il13    | Male   | 0.000112  | 0.000039  | 8 | 0.00011   | 0.000022  | 8 |             |      |          |
|                                                                 |         | Female | 0.000103  | 0.000027  | 8 | 0.0000806 | 0.000015  | 8 | ns          | ns   | ns       |
| Interleukin 13 receptor, alpha 2                                | il13ra2 | Male   | 0.000052  | 0.0000083 | 8 | 0.0000631 | 0.0000083 | 8 |             |      |          |
|                                                                 |         | Female | 0.000055  | 0.000015  | 8 | 0.0000376 | 0.0000064 | 7 | ns          | ns   | ns       |
| Interleukin 1 alpha                                             | il1a    | Male   | 0.000554  | 0.000042  | 8 | 0.00053   | 0.00011   | 8 |             |      |          |
|                                                                 |         | Female | 0.00058   | 0.000074  | 7 | 0.000719  | 0.0001    | 8 | ns          | ns   | ns       |
| Interleukin 1 beta                                              | il1b    | Male   | 0.00379   | 0.00065   | 7 | 0.0027    | 0.00049   | 7 |             |      |          |
|                                                                 |         | Female | 0.00332   | 0.00027   | 8 | 0.00329   | 0.00068   | 8 | ns          | ns   | ns       |
| Interleukin 4                                                   | il4     | Male   | 0.000194  | 0.000041  | 8 | 0.000309  | 0.000081  | 8 |             |      |          |
|                                                                 |         | Female | 0.000234  | 0.00003   | 8 | 0.000187  | 0.000042  | 8 | ns          | ns   | ns       |
| Interleukin 5                                                   | il5     | Male   | 0.000322  | 0.000082  | 8 | 0.000323  | 0.000032  | 8 |             |      |          |
|                                                                 |         | Female | 0.000353  | 0.000071  | 8 | 0.000482  | 0.000077  | 7 | ns          | ns   | ns       |
| Integrin linked kinase                                          | ilk     | Male   | 0.151     | 0.0058    | 7 | 0.145     | 0.0033    | 7 |             |      |          |
|                                                                 |         | Female | 0.142     | 0.006     | 7 | 0.143     | 0.0026    | 7 | ns          | ns   | ns       |
| Inhibin beta E                                                  | Inhbe   | Male   | 0.0000214 | 0.0000032 | 7 | 0.000014  | 0.0000013 | 8 |             |      |          |
|                                                                 |         | Female | 0.0000208 | 0.0000028 | 7 | 0.0000249 | 0.0000051 | 8 | ns          | ns   | ns       |
| Integrin alpha 1                                                | Itga1   | Male   | 0.0797    | 0.0043    | 8 | 0.0819    | 0.0048    | 8 |             |      |          |
|                                                                 |         | Female | 0.0763    | 0.0028    | 7 | 0.0748    | 0.003     | 7 | ns          | ns   | ns       |
| Integrin alpha 2                                                | Itga2   | Male   | 0.00114   | 0.00014   | 7 | 0.00125   | 0.000081  | 7 |             |      |          |
|                                                                 |         | Female | 0.00149   | 0.00007   | 8 | 0.00139   | 0.000093  | 8 | ns          | *    | ns       |
| Integrin alpha 3                                                | Itga3   | Male   | 0.00739   | 0.00054   | 8 | 0.00758   | 0.00065   | 8 |             |      |          |
|                                                                 |         | Female | 0.00836   | 0.00076   | 8 | 0.00753   | 0.00034   | 7 | ns          | ns   | ns       |

|                                                                            |           |        |           |          |   |           |           |   |    |      |    |
|----------------------------------------------------------------------------|-----------|--------|-----------|----------|---|-----------|-----------|---|----|------|----|
| Integrin alpha V                                                           | Itgav     | Male   | 0.0574    | 0.0029   | 8 | 0.0588    | 0.0024    | 8 |    |      |    |
|                                                                            |           | Female | 0.0579    | 0.0016   | 7 | 0.0641    | 0.004     | 8 | ns | ns   | ns |
| Integrin beta 1 (fibronectin receptor beta)                                | Itgb1     | Male   | 0.679     | 0.023    | 8 | 0.615     | 0.032     | 8 |    |      |    |
|                                                                            |           | Female | 0.643     | 0.028    | 8 | 0.636     | 0.053     | 8 | ns | ns   | ns |
| Integrin beta 3                                                            | Itgb3     | Male   | 0.00357   | 0.0006   | 7 | 0.00336   | 0.00028   | 7 |    |      |    |
|                                                                            |           | Female | 0.00352   | 0.00035  | 8 | 0.00339   | 0.00027   | 8 | ns | ns   | ns |
| Integrin beta 5                                                            | Itgb5     | Male   | 0.0857    | 0.0037   | 8 | 0.0903    | 0.001     | 8 |    |      |    |
|                                                                            |           | Female | 0.0808    | 0.0034   | 8 | 0.0982    | 0.0073    | 8 | ns | ns   | *  |
| Integrin beta 6                                                            | Itgb6     | Male   | 0.0676    | 0.0041   | 8 | 0.0759    | 0.0065    | 8 |    |      |    |
|                                                                            |           | Female | 0.0782    | 0.0056   | 8 | 0.0912    | 0.0098    | 8 | ns | ns   | ns |
| Integrin beta 8                                                            | Itgb8     | Male   | 0.00315   | 0.00044  | 8 | 0.00338   | 0.00033   | 8 |    |      |    |
|                                                                            |           | Female | 0.00321   | 0.000097 | 7 | 0.00333   | 0.00022   | 8 | ns | ns   | ns |
| Jun oncogene                                                               | Jun       | Male   | 0.127     | 0.0035   | 8 | 0.11      | 0.0068    | 8 |    |      |    |
|                                                                            |           | Female | 0.112     | 0.0092   | 8 | 0.117     | 0.01      | 8 | ns | ns   | ns |
| Lysyl oxidase                                                              | Lox       | Male   | 0.00679   | 0.0004   | 7 | 0.00518   | 0.00045   | 7 |    |      |    |
|                                                                            |           | Female | 0.00528   | 0.0004   | 8 | 0.00483   | 0.00046   | 8 | ns | *    | *  |
| Latent transforming growth factor beta binding protein 1                   | Ltbp1     | Male   | 0.0974    | 0.0068   | 8 | 0.104     | 0.0083    | 8 |    |      |    |
|                                                                            |           | Female | 0.0973    | 0.0024   | 7 | 0.102     | 0.0057    | 7 | ns | ns   | ns |
| Matrix metalloproteinase 13                                                | MMP-13    | Male   | 0.00234   | 0.00018  | 8 | 0.00198   | 0.00018   | 8 |    |      |    |
|                                                                            |           | Female | 0.00235   | 0.00016  | 7 | 0.00183   | 0.00019   | 7 | ns | ns   | *  |
| Matrix metalloproteinase 14 (membrane-inserted)                            | Mmp14     | Male   | 0.0143    | 0.00082  | 8 | 0.019     | 0.0022    | 8 |    |      |    |
|                                                                            |           | Female | 0.0177    | 0.0012   | 8 | 0.019     | 0.0022    | 8 | ns | ns   | ns |
| Matrix metalloproteinase 1a (interstitial collagenase)                     | Mmp1a     | Male   | 1.19      | 0.086    | 7 | 1.18      | 0.086     | 8 |    |      |    |
|                                                                            |           | Female | 1.33      | 0.13     | 8 | 1.01      | 0.095     | 7 | ns | ns   | ns |
| Matrix metalloproteinase 2                                                 | MMP-2     | Male   | 0.0469    | 0.002    | 8 | 0.0539    | 0.0013    | 7 |    |      |    |
|                                                                            |           | Female | 0.0526    | 0.0051   | 8 | 0.0714    | 0.0065    | 8 | ns | *    | ** |
| Matrix metalloproteinase 3                                                 | Mmp3      | Male   | 0.00744   | 0.00093  | 8 | 0.00777   | 0.00088   | 8 |    |      |    |
|                                                                            |           | Female | 0.00411   | 0.00036  | 8 | 0.00423   | 0.00033   | 7 | ns | **** | ns |
| Matrix metalloproteinase 8                                                 | Mmp8      | Male   | 0.000118  | 0.000029 | 8 | 0.000112  | 0.000035  | 7 |    |      |    |
|                                                                            |           | Female | 0.000125  | 0.000037 | 8 | 0.0000481 | 0.000016  | 8 | ns | ns   | ns |
| Matrix metalloproteinase 9                                                 | MMP-9     | Male   | 0.00167   | 0.00027  | 8 | 0.00259   | 0.00019   | 7 |    |      |    |
|                                                                            |           | Female | 0.00176   | 0.00035  | 7 | 0.00272   | 0.00024   | 8 | ns | ns   | ** |
| Myelocytomatosis oncogene                                                  | Myc       | Male   | 0.00446   | 0.00036  | 7 | 0.00494   | 0.00057   | 7 |    |      |    |
|                                                                            |           | Female | 0.00522   | 0.00033  | 8 | 0.00576   | 0.00052   | 8 | ns | ns   | ns |
| Nuclear factor of kappa light polypeptide gene enhancer in B-cells 1, p105 | Nfkb1     | Male   | 0.0559    | 0.0017   | 8 | 0.0558    | 0.0026    | 8 |    |      |    |
|                                                                            |           | Female | 0.053     | 0.003    | 8 | 0.056     | 0.0018    | 7 | ns | ns   | ns |
| Platelet derived growth factor, alpha                                      | Pdgfa     | Male   | 0.0127    | 0.00066  | 7 | 0.0145    | 0.00041   | 7 |    |      |    |
|                                                                            |           | Female | 0.0134    | 0.0011   | 8 | 0.0166    | 0.0016    | 8 | ns | ns   | *  |
| Platelet derived growth factor, beta polypeptide                           | Pdgfb     | Male   | 0.0629    | 0.0045   | 8 | 0.0616    | 0.0035    | 8 |    |      |    |
|                                                                            |           | Female | 0.0587    | 0.0046   | 8 | 0.052     | 0.0026    | 8 | ns | ns   | ns |
| Plasminogen activator, tissue                                              | Plat      | Male   | 0.034     | 0.0019   | 8 | 0.0355    | 0.0017    | 8 |    |      |    |
|                                                                            |           | Female | 0.0395    | 0.0018   | 8 | 0.0351    | 0.0013    | 7 | ns | ns   | ns |
| Plasminogen activator, urokinase                                           | Plau      | Male   | 0.00523   | 0.00027  | 8 | 0.00663   | 0.00081   | 8 |    |      |    |
|                                                                            |           | Female | 0.00384   | 0.00021  | 7 | 0.00516   | 0.00034   | 8 | ns | **   | ** |
| Plasminogen                                                                | Plg       | Male   | 0.0000793 | 0.00002  | 7 | 0.0000946 | 0.000023  | 8 |    |      |    |
|                                                                            |           | Female | 0.00113   | 0.00069  | 7 | 0.000197  | 0.000042  | 6 | ns | ns   | ns |
| Serine (or cysteine) peptidase inhibitor, clade A, member 1a               | Serpina1a | Male   | 0.00149   | 0.00085  | 7 | 0.000167  | 0.000079  | 6 |    |      |    |
|                                                                            |           | Female | 0.0000332 | 0.000015 | 7 | 0.0000134 | 0.0000013 | 7 | ns | ns   | ns |
| Serine (or cysteine) peptidase inhibitor, clade E, member 1                | Serpine1  | Male   | 0.0311    | 0.0068   | 8 | 0.0231    | 0.0032    | 8 |    |      |    |
|                                                                            |           | Female | 0.0229    | 0.0028   | 8 | 0.0223    | 0.0013    | 7 | ns | ns   | ns |
| Serine (or cysteine) peptidase inhibitor, clade H, member 1                | Serpirh1  | Male   | 0.272     | 0.016    | 8 | 0.293     | 0.022     | 8 |    |      |    |
|                                                                            |           | Female | 0.235     | 0.017    | 8 | 0.269     | 0.015     | 8 | ns | ns   | ns |
| MAD homolog 2 (Drosophila)                                                 | Smad2     | Male   | 0.0325    | 0.00074  | 7 | 0.0328    | 0.0018    | 8 |    |      |    |
|                                                                            |           | Female | 0.0314    | 0.0012   | 8 | 0.0309    | 0.00087   | 7 | ns | ns   | ns |
| MAD homolog 3 (Drosophila)                                                 | Smad3     | Male   | 0.0164    | 0.0009   | 8 | 0.018     | 0.0014    | 8 |    |      |    |
|                                                                            |           | Female | 0.0169    | 0.00044  | 7 | 0.0196    | 0.0013    | 8 | ns | ns   | ns |
| MAD homolog 4 (Drosophila)                                                 | Smad4     | Male   | 0.187     | 0.0058   | 7 | 0.185     | 0.014     | 8 |    |      |    |
|                                                                            |           | Female | 0.176     | 0.0087   | 8 | 0.165     | 0.0033    | 7 | ns | ns   | ns |
| MAD homolog 6 (Drosophila)                                                 | Smad6     | Male   | 0.0127    | 0.00095  | 8 | 0.0162    | 0.002     | 8 |    |      |    |
|                                                                            |           | Female | 0.0115    | 0.0011   | 8 | 0.012     | 0.00063   | 7 | ns | ns   | ns |
| MAD homolog 7 (Drosophila)                                                 | Smad7     | Male   | 0.0153    | 0.001    | 7 | 0.0164    | 0.0026    | 7 |    |      |    |
|                                                                            |           | Female | 0.00996   | 0.00081  | 7 | 0.0126    | 0.0012    | 7 | ns | **   | ns |
| Snail homolog 1 (Drosophila)                                               | Snail     | Male   | 0.000321  | 0.000026 | 7 | 0.000388  | 0.00004   | 8 |    |      |    |
|                                                                            |           | Female | 0.00036   | 0.000052 | 7 | 0.000421  | 0.000073  | 8 | ns | ns   | ns |
| Trans-acting transcription factor 1                                        | Sp1       | Male   | 0.041     | 0.0025   | 8 | 0.042     | 0.0017    | 8 |    |      |    |
|                                                                            |           | Female | 0.0435    | 0.0014   | 8 | 0.0425    | 0.00098   | 7 | ns | ns   | ns |
| Signal transducer and activator of transcription 1                         | Stat1     | Male   | 0.0643    | 0.0036   | 8 | 0.0677    | 0.0026    | 7 |    |      |    |
|                                                                            |           | Female | 0.0828    | 0.0063   | 8 | 0.074     | 0.0043    | 8 | ns | *    | ns |
| Signal transducer and activator of transcription 6                         | Stat5     | Male   | 0.00465   | 0.00042  | 8 | 0.00484   | 0.00039   | 8 |    |      |    |
|                                                                            |           | Female | 0.00372   | 0.00035  | 8 | 0.00417   | 0.00048   | 8 | ns | ns   | ns |
| Transforming growth factor, beta 1                                         | TGF-β1    | Male   | 0.0785    | 0.0052   | 8 | 0.0782    | 0.0026    | 8 |    |      |    |
|                                                                            |           | Female | 0.0714    | 0.0035   | 7 | 0.0688    | 0.0032    | 8 | ns | *    | ns |
| Transforming growth factor, beta 2                                         | Tgfb2     | Male   | 0.0139    | 0.0011   | 7 | 0.0175    | 0.0013    | 8 |    |      |    |
|                                                                            |           | Female | 0.0158    | 0.00098  | 8 | 0.0182    | 0.0012    | 8 | ns | ns   | *  |
| Transforming growth factor, beta 3                                         | Tgfb3     | Male   | 0.0232    | 0.0014   | 8 | 0.0255    | 0.0012    | 8 |    |      |    |
|                                                                            |           | Female | 0.0214    | 0.0015   | 8 | 0.0233    | 0.0015    | 8 | ns | ns   | ns |
| Transforming growth factor, beta receptor I                                | Tgfb1     | Male   | 0.0186    | 0.00097  | 8 | 0.0179    | 0.00063   | 8 |    |      |    |
|                                                                            |           | Female | 0.0154    | 0.00082  | 8 | 0.0155    | 0.00074   | 8 | ns | **   | ns |

|                                              |       |        |         |         |   |          |         |   |    |     |    |
|----------------------------------------------|-------|--------|---------|---------|---|----------|---------|---|----|-----|----|
| Transforming growth factor, beta receptor II | Tgfb2 | Male   | 0.071   | 0.0028  | 8 | 0.0681   | 0.0021  | 8 |    |     |    |
|                                              |       | Female | 0.0637  | 0.0054  | 8 | 0.0668   | 0.0049  | 8 | ns | ns  | ns |
| TGFβ-induced factor homeobox 1               | Tgif1 | Male   | 0.00209 | 0.00016 | 8 | 0.00245  | 0.00024 | 8 |    |     |    |
|                                              |       | Female | 0.00229 | 0.00012 | 8 | 0.00265  | 0.00022 | 8 | ns | ns  | ns |
| Thrombospondin 1                             | Thbs1 | Male   | 0.0464  | 0.011   | 8 | 0.0327   | 0.0052  | 8 |    |     |    |
|                                              |       | Female | 0.0193  | 0.0023  | 8 | 0.0147   | 0.0016  | 8 | ns | *** | ns |
| Thrombospondin 2                             | Thbs2 | Male   | 0.0254  | 0.0025  | 8 | 0.0197   | 0.0017  | 8 |    |     |    |
|                                              |       | Female | 0.0234  | 0.0013  | 8 | 0.0239   | 0.0013  | 8 | ns | ns  | ns |
| Tissue inhibitor of metalloproteinase 1      | TIMP1 | Male   | 0.00267 | 0.00041 | 8 | 0.00172  | 0.00051 | 7 |    |     |    |
|                                              |       | Female | 0.00312 | 0.00036 | 8 | 0.0022   | 0.00053 | 8 | ns | ns  | *  |
| Tissue inhibitor of metalloproteinase 2      | TIMF2 | Male   | 0.135   | 0.0056  | 8 | 0.126    | 0.0024  | 7 |    |     |    |
|                                              |       | Female | 0.122   | 0.0026  | 7 | 0.146    | 0.0058  | 8 | ** | ns  | ns |
| Tissue inhibitor of metalloproteinase 3      | Timp3 | Male   | 0.177   | 0.023   | 8 | 0.137    | 0.0046  | 7 |    |     |    |
|                                              |       | Female | 0.144   | 0.0093  | 8 | 0.149    | 0.004   | 8 | ns | ns  | ns |
| Tissue inhibitor of metalloproteinase 4      | Timp4 | Male   | 0.102   | 0.014   | 7 | 0.0813   | 0.0086  | 7 |    |     |    |
|                                              |       | Female | 0.0715  | 0.0066  | 8 | 0.0675   | 0.0071  | 7 | ns | *   | ns |
| Tumor necrosis factor                        | Tnf   | Male   | 0.00149 | 0.00018 | 8 | 0.0014   | 0.00017 | 8 |    |     |    |
|                                              |       | Female | 0.00171 | 0.00046 | 8 | 0.000904 | 0.00014 | 8 | ns | ns  | ns |
| Vascular endothelial growth factor A         | Vegfa | Male   | 0.481   | 0.02    | 8 | 0.518    | 0.02    | 8 |    |     |    |
|                                              |       | Female | 0.452   | 0.017   | 7 | 0.463    | 0.024   | 8 | ns | ns  | ns |
